# Supplementary material for: Maximum-Likelihood Model Averaging To Profile Clustering of Site Types across Discrete Linear Sequences
Source: PLoS Comput Biol. 2009 Jun 26;5(6):e1000421. doi: 10.1371/journal.pcbi.1000421 (PMC2695770; doi:10.1371/journal.pcbi.1000421)
Supplement: Table S2 — Power to detect heterogeneous clusters, evaluating a range of ratios of variant rates within the cluster to outside of the cluster (r) (0.02 MB XLS) [file pcbi.1000421.s002.xls]

## Sheet: Table S2
Supporting Information
Maximum-likelihood model averaging to profile clustering of site types across discrete linear sequences
Zhang Zhang and Jeffrey P. Townsend* Department of Ecology and Evolutionary Biology, Yale University, New Haven, Connecticut 06520, United States of America *Corresponding author. Jeffrey.Townsend@Yale.edu
Table S2 Power to detect heterogeneous clusters, evaluating a range of ratios of variant rates within the cluster to outside of the cluster (r)
r	ECDF	HC				r	ECDF	HC
		AIC	AICc	BIC				AIC	AICc	BIC
	Hot Spots					Cold Spots
2	0.0309	0.0195	0.0195	0.019		0.1	0.0967	0.4034	0.4034	0.4034
3	0.0674	0.1293	0.1293	0.1293		0.2	0.0797	0.1877	0.1877	0.1877
4	0.1069	0.2262	0.2262	0.2262		0.3	0.0545	0.1364	0.1364	0.1364
5	0.1243	0.3143	0.3143	0.3143		0.4	0.0385	0.0708	0.0708	0.0708
6	0.1426	0.3763	0.3763	0.3763		0.5	0.0293	0.025	0.025	0.0239
7	0.1492	0.4347	0.4347	0.4347		0.6	0.0186	0.0012	0.0012	0.0002
8	0.1522	0.4699	0.4699	0.4699		0.7	0.0036	0	0	0
9	0.161	0.5352	0.5352	0.5352		0.8	0	0	0	0
10	0.1658	0.5372	0.5372	0.5372		0.9	0	0	0	0
Note: Each value was the average of 10000 replicate simulated sequences, with each sequence composed of 1000 sites. The percentage of variant sites within the cluster (q) was set 60%.
