# Supplementary material for: Maximum-Likelihood Model Averaging To Profile Clustering of Site Types across Discrete Linear Sequences
Source: PLoS Comput Biol. 2009 Jun 26;5(6):e1000421. doi: 10.1371/journal.pcbi.1000421 (PMC2695770; doi:10.1371/journal.pcbi.1000421)
Supplement: Table S3 — Power to detect heterogeneous clusters, evaluating a range of sequence lengths (0.02 MB XLS) [file pcbi.1000421.s003.xls]

## Sheet: Table S3
Supporting Information
Maximum-likelihood model averaging to profile clustering of site types across discrete linear sequences
Zhang Zhang and Jeffrey P. Townsend* Department of Ecology and Evolutionary Biology, Yale University, New Haven, Connecticut 06520, United States of America *Corresponding author. Jeffrey.Townsend@Yale.edu
Table S3 Power to detect heterogeneous clusters, evaluating a range of sequence lengths
Sequence Length	Hot Spots					Cold Spots
	ECDF	HC				ECDF	HC
		AIC	AICc	BIC			AIC	AICc	BIC
100	0.155	0.3371	0.3371	0.3371		0.0553	0.8046	0.8046	0.8046
200	0.0818	0.1268	0.1268	0.1268		0.0366	0.1752	0.1752	0.1752
300	0.0623	0.0871	0.0871	0.0871		0.0371	0.1136	0.1136	0.1136
400	0.0463	0.0622	0.0622	0.0622		0.0311	0.0811	0.0811	0.0811
500	0.0428	0.0559	0.0559	0.0559		0.0334	0.0708	0.0708	0.0708
600	0.0411	0.0493	0.0493	0.0493		0.0318	0.0587	0.0587	0.0587
700	0.0442	0.0559	0.0559	0.0559		0.0319	0.0591	0.0591	0.0591
800	0.0458	0.0524	0.0524	0.0524		0.0328	0.0532	0.0532	0.0532
900	0.0415	0.0494	0.0494	0.0494		0.0288	0.0479	0.0479	0.0479
1000	0.0372	0.0445	0.0445	0.0445		0.0283	0.0477	0.0477	0.0477
Note: Each value was the average of 10000 replicate simulated sequences. Parameters were set at n = 30 and q = 60%. Ratios of variant rates within the cluster to outside of the cluster were set at r = 5:1 and r = 1:5, representing hot spots (panel A) and cold spots (panel B), respectively.
