# Supplementary material for: Maximum-Likelihood Model Averaging To Profile Clustering of Site Types across Discrete Linear Sequences
Source: PLoS Comput Biol. 2009 Jun 26;5(6):e1000421. doi: 10.1371/journal.pcbi.1000421 (PMC2695770; doi:10.1371/journal.pcbi.1000421)
Supplement: Table S4 — Power to detect multiple heterogeneous clusters (0.02 MB XLS) [file pcbi.1000421.s004.xls]

## Sheet: Table S4
Supporting Information
Maximum-likelihood model averaging to profile clustering of site types across discrete linear sequences
Zhang Zhang and Jeffrey P. Townsend* Department of Ecology and Evolutionary Biology, Yale University, New Haven, Connecticut 06520, United States of America *Corresponding author. Jeffrey.Townsend@Yale.edu
Table S4 Power to detect multiple heterogeneous clusters
Number of substitutions	Number of clusters	ECDF	HC
			AIC	AICc	BIC
10	1	0.0743	0.0784	0.0784	0.0784
	2	0	0.0004	0.0004	0
	3	0	0	0	0
	4	0	0	0	0
	5	0	0	0	0
	6	0	0	0	0
	7	0	0	0	0
	8	0	0	0	0
	9	0	0	0	0
	10	0	0	0	0
50	1	0.651	0.7772	0.7772	0.7772
	2	0	0.2075	0.2075	0.0732
	3	0	0.0137	0.0137	0.0019
	4	0	0.0004	0.0004	0
	5	0	0.0002	0.0002	0
	6	0	0	0	0
	7	0	0	0	0
	8	0	0	0	0
	9	0	0	0	0
	10	0	0	0	0
100	1	0.9083	0.982	0.982	0.982
	2	0	0.7481	0.748	0.3309
	3	0	0.3302	0.3302	0.0828
	4	0	0.1212	0.1212	0.0157
	5	0	0.0768	0.0756	0.005
	6	0	0.0028	0.0028	0
	7	0	0.0017	0.0013	0
	8	0	0.0007	0.0001	0
	9	0	0	0	0
	10	0	0	0	0
200	1	0.9971	0.9999	0.9999	0.9999
	2	0	0.9965	0.9965	0.2828
	3	0	0.9308	0.9238	0.0887
	4	0	0.645	0.6342	0.1018
	5	0	0.3286	0.2857	0.0152
	6	0	0.0927	0.0565	0.0016
	7	0	0.0134	0.008	0.0003
	8	0	0	0	0
	9	0	0	0	0
	10	0	0	0	0
Note: Each value was the average of 10000 replicate simulated sequences, with each sequence composed of 1000 sites. The summed width of all clusters was always 40% of entire sequence length.
